# Supplementary material for: Eco-friendly preparation of ultrathin biomass-derived Ni3S2-doped carbon nanosheets for selective hydrogenolysis of lignin model compounds in the absence of hydrogen
Source: Royal Society of Chemistry journal article supplement (doi:10.1039/d1gc00510c), 2021-01-01
Supplement: d1gc00510c1.pdf [file d1gc00510c1.pdf]

# Eco-Friendly Preparation of Ultrathin Biomass-Derived Ni<sub>3</sub>S<sub>2</sub>-Doped Carbon Nanosheets for Selective Hydrogenolysis of Lignin Model Compounds in the Absence of Hydrogen

Changzhou Chen<sup>ac†</sup>, Dichao Wu<sup>ac†</sup>, Peng Liu<sup>ac</sup>, Jing Li<sup>ac</sup>, Haihong Xia<sup>ac</sup>,

Minghao Zhou<sup>b\*</sup>, Jianchun Jiang<sup>ac\*</sup>

*a. Institute of Chemical Industry of Forest Products, Chinese Academy of Forestry; Key Lab. of Biomass Energy and Material, Jiangsu Province; National Engineering Lab. for Biomass Chemical Utilization; Key and Open Lab. on Forest Chemical Engineering, SFA, Nanjing 210042, China*

*b. School of Chemistry and Chemical Engineering, Yangzhou University, Yangzhou 225002, China*

*c. Co-Innovation Center of Efficient Processing and Utilization of Forest Resources, Nanjing Forestry University, Nanjing 210037, China*

\* Corresponding Author: E-mail: [zhouminghao@yzu.edu.cn](mailto:zhouminghao@yzu.edu.cn) (Minghao Zhou)  
[jiangjc@icifp.cn](mailto:jiangjc@icifp.cn) (Jianchun Jiang)

†These authors contributed equally: Changzhou Chen and Dichao Wu.

Table S1 ICP result of the fresh and used catalyst after five runs.

|                                                  | C (%) | Ni (%) | S (%) |
|--------------------------------------------------|-------|--------|-------|
| Ni <sub>3</sub> S <sub>2</sub> -CSs-0.2-700      | 90.8  | 6.5    | 2.7   |
| Ni <sub>3</sub> S <sub>2</sub> -CSs-0.4-700      | 81.3  | 13.2   | 5.5   |
| Ni <sub>3</sub> S <sub>2</sub> -CSs-0.6-700      | 71.7  | 19.2   | 9.1   |
| Ni <sub>3</sub> S <sub>2</sub> -CSs-0.8-700      | 62.9  | 27.1   | 10.0  |
| Used Ni <sub>3</sub> S <sub>2</sub> -CSs-0.4-700 | 91.5  | 6.2    | 2.3   |

Table S2 cleavage of  $\beta$ -O-4 lignin model compounds in different solvents.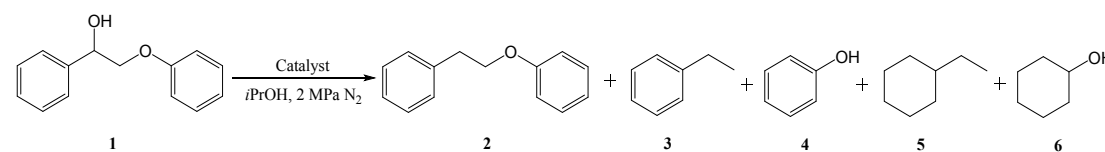

| Entry | Cat.                                        | Solvent         | Temp<br>(°C)/<br>T.(h) | Conv.<br>(%) <sup>b</sup> | Yield(%) <sup>b</sup> |    |    |   |   |
|-------|---------------------------------------------|-----------------|------------------------|---------------------------|-----------------------|----|----|---|---|
|       |                                             |                 |                        |                           | 2                     | 3  | 4  | 5 | 6 |
| 1     | Ni <sub>3</sub> S <sub>2</sub> -CSs-0.4-700 | ethylene glycol | 260/4                  | 42                        | 21                    | 19 | 17 | 0 | 0 |
| 2     | Ni <sub>3</sub> S <sub>2</sub> -CSs-0.4-700 | formic acid     | 260/4                  | 30                        | 18                    | 11 | 9  | 0 | 0 |

<sup>a</sup> Reaction conditions: **1** (100mg), Cat. (20mg), *i*PrOH (10 mL), 2.0 MPa N<sub>2</sub>, 260 °C, 4 h; <sup>b</sup> Conversion and yields were determined by GC/MS with n-dodecane as the internal standard;

Table S3 Molecular weight of original and residual lignin under different reaction condition.

| Entry | T/°C            | Time/h | M <sub>w</sub> (g/mol) | M <sub>n</sub> (g/mol) | PDI<br>(M <sub>w</sub> /M <sub>n</sub> ) |
|-------|-----------------|--------|------------------------|------------------------|------------------------------------------|
| 1     | Alkaline lignin |        | 2092                   | 1306                   | 1.602                                    |
| 2     | 260             | 4      | 1840                   | 1156                   | 1.591                                    |
| 3     | 280             | 4      | 1765                   | 1102                   | 1.575                                    |
| 4     | 280             | 8      | 1610                   | 1035                   | 1.555                                    |

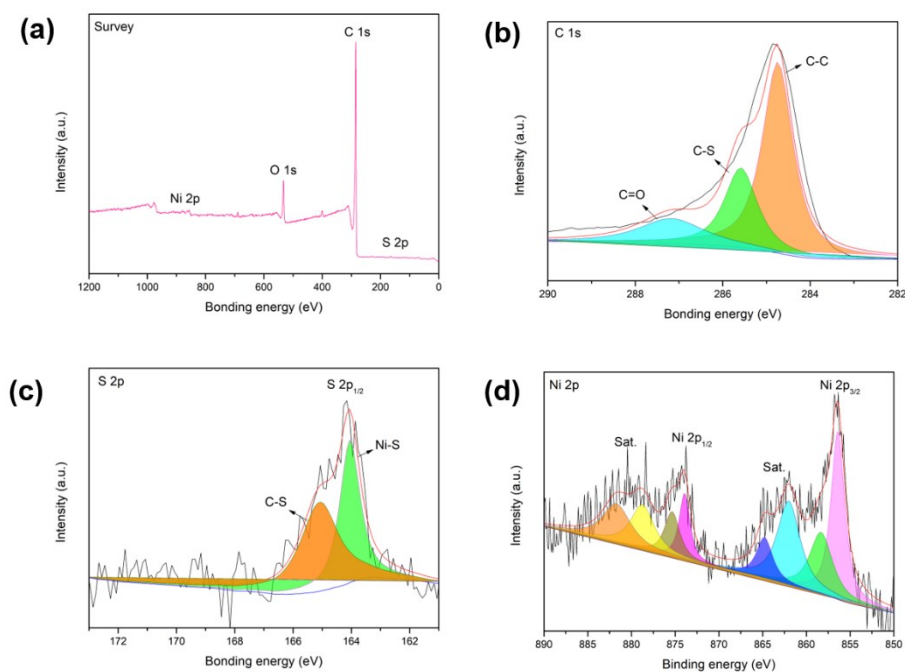

Fig. S1 XPS spectra of used  $\text{Ni}_3\text{S}_2\text{-CSs-0.4-700}$  catalyst.

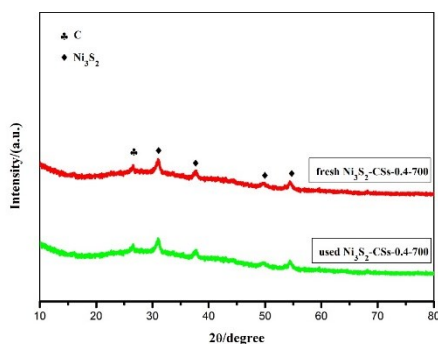

Fig. S2 XRD pattern of fresh and used  $\text{Ni}_3\text{S}_2\text{-CSs-0.4-700}$  catalyst.

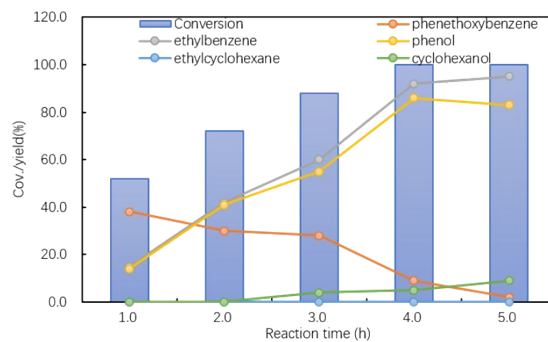

Fig. S3 The time course of the product distributions for the conversion of  $\beta\text{-O-4}$  model compound over  $\text{Ni}_3\text{S}_2\text{-CSs-0.4-700}$ .

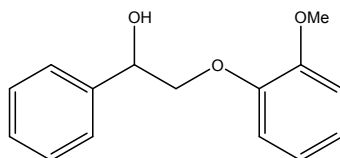

$^1\text{H NMR}$  (400 MHz,  $\text{CDCl}_3$ )  $\delta$  7.43 – 7.27 (m, 5H), 6.98 – 6.85 (m, 4H), 5.10 (dd,  $J = 9.6, 2.8$  Hz, 1H), 4.15 (dd,  $J = 10.0, 2.8$  Hz, 1H), 3.98 (t,  $J = 9.7$  Hz, 1H), 3.86 (s, 1H), 3.83 (s, 3H).

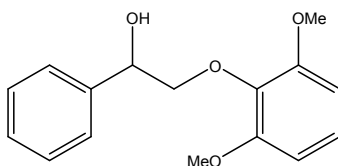

$^1\text{H NMR}$  (500 MHz,  $\text{CDCl}_3$ )  $\delta$  7.55 (d,  $J = 6.8$  Hz, 2H), 7.37– 7.29 (m, 3H), 6.97 (t,  $J = 7.5$  Hz, 1H), 6.73 (d,  $J = 7.5$  Hz, 2H), 5.16 – 5.12 (m, 1H), 4.58 (dd,  $J = 12.5, 7.0$  Hz, 1H), 4.22 (dd,  $J = 12.5, 7.0$  Hz, 1H), 3.80 (s, 6H), 3.23 (d,  $J = 4.9$  Hz, 1H).

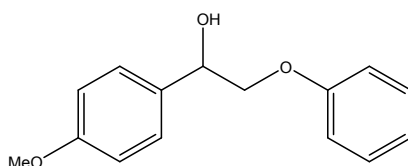

$^1\text{H NMR}$  (400 MHz,  $\text{CDCl}_3$ )  $\delta$  7.34 (d,  $J = 8.4$  Hz, 2H), 7.25 (dd,  $J = 8.7, 7.2$  Hz, 2H), 6.94 (t,  $J = 7.2$  Hz, 1H), 6.90 – 6.88 (m, 4H), 5.02 (dd,  $J = 8.3, 3.6$  Hz, 1H), 4.00 (qd,  $J = 9.6, 6.1$  Hz, 2H), 3.77 (s, 3H), 3.27 (s, 1H).

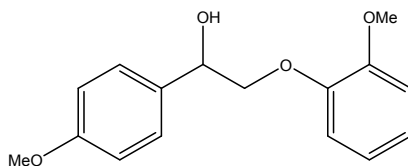

$^1\text{H NMR}$  (400 MHz,  $\text{CDCl}_3$ )  $\delta$  7.36 (d,  $J = 8.5$  Hz, 2H), 7.00 – 6.96 (m, 1H), 6.93 – 6.88 (m, 5H), 5.07 (d,  $J = 9.2$  Hz, 1H), 4.13 (dd,  $J = 10.0, 2.9$  Hz, 1H), 3.98 (t,  $J = 9.7$  Hz, 1H), 3.86 (s, 3H), 3.81 (s, 3H), 2.24 (s, 1H).

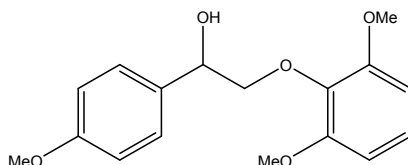

$^1\text{H}$  NMR (400 MHz,  $\text{CDCl}_3$ )  $\delta$  7.34 (d,  $J = 6.7$  Hz, 2H), 6.97 (t,  $J = 7.4$  Hz, 1H), 6.88 (d,  $J = 7.5$  Hz, 2H), 6.76 (d,  $J = 7.5$  Hz, 2H), 5.12 (dt,  $J = 6.9, 6.0$  Hz, 1H), 4.59 (dd,  $J = 12.4, 7.1$  Hz, 1H), 4.22 (dd,  $J = 12.4, 7.1$  Hz, 1H), 3.80 (s, 9H), 3.23 (d,  $J = 4.9$  Hz, 1H).

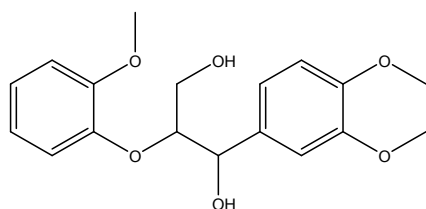

$^1\text{H}$  NMR (400 MHz,  $\text{CDCl}_3$ )  $\delta$  7.04 (td,  $J = 8.1, 1.9$  Hz, 1H), 6.98 – 6.87 (m, 5H), 6.82 (d,  $J = 8.3$  Hz, 1H), 4.97 (t,  $J = 4.1$  Hz, 1H), 4.15 (dd,  $J = 8.8, 5.3$  Hz, 1H), 3.94 – 3.88 (m, 1H), 3.86 (s, 9H), 3.69 – 3.65 (m, 2H), 2.90 (dd,  $J = 7.2, 5.7$  Hz, 1H).

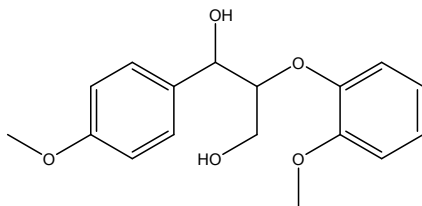

$^1\text{H}$  NMR (400 MHz,  $\text{CDCl}_3$ )  $\delta$  7.36 (d,  $J = 8.7$  Hz, 1H), 7.31 (d,  $J = 8.7$  Hz, 1H), 7.14 – 7.03 (m, 2H), 6.97 – 6.87 (m, 4H), 4.99 (d,  $J = 7.7$  Hz, 1H), 4.15 (dt,  $J = 7.8, 3.4$  Hz, 0.5H), 4.05 – 4.01 (m, 0.5H), 3.89 (d,  $J = 12.6$  Hz, 3H), 3.80 (s, 3H), 3.67 – 3.54 (m, 2H), 3.45 (ddd,  $J = 12.3, 8.0, 3.9$  Hz, 1H), 2.87 – 2.76 (m, 1H).
